# Supplementary material for: Mistol fruit (Sarcomphalus mistol) as an ingredient in nutritious value-added foods to the local bioeconomy
Source: Research Square preprint supplement (doi:10.21203/rs.3.rs-7497291/v1), 2025-09-08
Supplement: Supplementary file 1 [file 83d341b65f2cb40467f50b3e.docx]

**Mistol fruit (*Sarcomphalus mistol*) as an ingredient in nutritious value-added foods to the local bioeconomy**

Villalba, R1; Coronel, E1; Carvajal, M1; Belotto, J1, Molinas, R1, Caballero S1, Friesen A1, Mereles, L1🖂

aUniversidad Nacional de Asunción, Facultad de Ciencias Químicas, Dirección de investigaciones. Biodiversidad, alimentos y Salud Team. Campus Universitario, San Lorenzo, Paraguay. P.O. 1055

🖂Corresponding author: [lauramereles@qui.una.py](mailto:lauramereles@qui.una.py)

**MATERIALS AND METHODS**

1. **Samples**

Mistol fruits were collected from the city of Filadelfia, in the Western Region or Paraguayan Chaco (GPS 22° 20' 53'' S and 60° 02' 43'' W). The fruits were collected at their fully ripe stage (reddish-brown skin), when they are typically consumed. Samples were collected for herbarium material, and botanical identification was performed by the Botany Department of FCQ-UNA. The fruits were transported to the laboratory and frozen at -20°C until analysis, where the pulp and peel were separated from the seed, excluding the seeds from the analysis. Products made from ripe fruits; marmalade, a roasted and ground mistol as a coffee substitute "mistol coffee", was made following the artisanal processes of a community in Filadelfia, in the Boquerón Department in the Central Chaco region. The marmalade and plant-based beverage, made from mistol and peanuts (*Arachis hypogaea*), was produced using an experimental formulation of "mistol coffee”. Preliminary affective tests were conducted to assess the acceptance and preference of three formulations of the marmalade and the beverage made with mistol and peanuts (table 1).

Table S1. Affective analysis table of 3 formulations of marmalade and mistol-peanuts-based beverage.

| Sample | Formulation | Acceptance panel preference |
| --- | --- | --- |
| Marmalade | A: 30% fruit (pulp+peel)  B: 45% fruit (pulp+peel)  C: 60% fruit (pulp+peel) | A: 53%  B: 30%  C: 17% |
| Mistol-peanuts-based beverage | D: 35% de Mistol infusion (3%) + 65% peanut milk.  E: 50% de Mistol infusion (3%) + 50% peanut milk.  F: 65% de Mistol infusion (3%) + 35% peanut milk. | A: 26%  B: 40%  C: 34% |

The affective sensory analysis showed that the formulation with 30% mistol fruit was the most appreciated by the panelists, offering an optimal balance of flavor, texture, and aroma. Briefly, to prepare the marmalade, the pulp and peel were separated from the seed, discarding the seed, and then cooked with sugar and water in proportion of 0.3:0.3:1 w/w/v of fruit: sugar:water, respectively. To prepare the "café de mistol" substitute, the whole fruits were roasted at 180°C and then ground in an industrial mill to separate the seed from the pulp and peel, then sieved to separate the seeds. The preparation procedures for the products were performed in triplicate. The mistol coffee and peanut beverage was obtained by blending 50% of the mistol coffee infusion (3% roasted and ground mistol in water at 95°C and infusing for 1 minute) with 50% peanut milk, with 0.3% lecithin added as an emulsifier, and 7% organic sugar. The peanut milk was obtained by soaking whole beans in hot water at 95°C for 30 minutes, peeling them, homogenizing them with high-speed water for 1 minute in a 1:6 (w/v) ratio, and filtering them with a qualitative double filter paper, yielding a milky liquid. This formulation was developed after preliminary testing, with three different formulations being developed, the selected one achieving the highest acceptance rate by a sensory analysis panel (previously described). This plant-based beverage was subsequently pasteurized at 80°C for 10 minutes. The resulting beverage was packaged in 2 L PET bottles at 65°C and rapidly cooled in an ice bath until the temperature reached 5°C. It was then stored at 4°C in a refrigerator. For physicochemical analysis, the beverage was freeze-dried using equipment (Telstar LyoQuest, Barcelona, Spain). The results were expressed per 100 grams of the freeze-dried beverage preparation (dry basis) or per 100 mL of the liquid beverage. This study did not specifically analyze the nutritional profile of the mistol coffee infusion. From a sensory perspective, it was observed that the flavor can be intense or dominant, so the optimal concentration of the preparation should be adjusted to individual consumer preferences to promote organoleptic acceptance. In the case of the beverage made with mistol and peanuts, a preliminary sensory analysis was conducted that determined the proportion of the most preferred ingredients, which provides a basis for future studies of hedonic acceptance and sensory intensity profile.

1. **Physicochemical Characteristics**

The longitudinal and transverse diameters of 50 mistol fruits from both batches were measured using a vernier caliper. Weights were determined using a Kern model ADB 200-4 analytical balance (Balingen, Germany) with a precision of 0.0001 gram. Averages and standard deviations were reported.

2.1. pH

This was determined according to AOAC method 981.12 [1] using a BOECO model MBT-700 potentiometer (Hamburg, Germany) at 25°C, directly in the homogenate of the samples.

2.2. Water activity

Determined according to AOAC method 978.18 [1] using a Rotronic AG model HP 23-A thermohygrometer (Bassersdorf, Switzerland), 3 grams of each sample were weighed.

2.3. Soluble solids or Degrees Brix

This was determined according to AOAC method 932.12 [1] using an ATAGO Pocket PAL 1 digital refractometer (Tokyo, Japan). The results were expressed in ° Brix [1].

1. **Nutritional Composition**

3.1. Moisture

Moisture content was determined according to AOAC method 934.06 [1]. A 5-gram sample was weighed in aluminum capsules, previously tared in a Tecnal TE-394/2 oven (Piracicaba, Brazil) at 105°C for 1 hour. The samples with the capsules were subjected to a conventional oven with air circulation for 4 hours. The moisture content was determined by the difference in sample weights; the results were expressed as grams of water per 100 grams of sample.

3.2. Total Available Carbohydrates and Sugars

These were determined by the anthrone colorimetric method as described by Osborne and Voogt [2]. For total sugars, 1 gram of each sample was weighed on an analytical balance in an Erlenmeyer flask and dissolved in a known amount of water. For total carbohydrates, 1 gram of each sample was weighed on an analytical balance in an Erlenmeyer flask, and 56% perchloric acid was added, allowing it to hydrolyze for 8 hours. After this time, it was filtered and dissolved in a flask with water. In both cases, for total sugars and total carbohydrates, an aliquot of the sample was reacted with anthrone, and the absorbance was read at 630 nm. The quantification of the total available sugars in the samples was performed by extrapolation of absorbance versus concentration, obtained from the graph of the absorbances of glucose solutions of known concentrations.

3.3. Total proteins

Protein content was determined by the Kjeldahl method AOAC 920.152 [1]. The protein content of the jams was determined by taking the total nitrogen content of the samples and multiplying it by the correction factor for fruit-based products (5.75). The results were expressed as grams of protein per 100 grams of sample

3.4. Dietary Fiber

Fiber content was determined gravimetrically according to AOAC method 993.2.1 [1]. To do this, 1 gram of sample was weighed, 25 mL of water was added, the sample was completely covered with aluminum foil and then left in a Precision Scientific Shal Form water bath (Waltham, United States) at 37°C for 90 minutes. After this time, 100 mL of 95% ethanol was added, and the sample was left to stand for 1 hour at room temperature. The sample was then filtered through ash-free filter papers previously tared in an oven. The residues were washed with two 20-mL portions of 78% ethanol, two 10-mL portions of 95% ethanol, and one 10-mL portion of acetone. The papers containing the residue were heated to a temperature of 105°C until completely dry. The sample was weighed on an analytical balance, and the residue's ash content and nitrogen compounds were determined using Kjeldahl.

3.5. Ash

Determined according to AOAC 940.26 methodology [1]. To do this, 1 gram of the sample was weighed in previously calibrated crucibles in a Naber D-2804 muffle furnace (Lilienthal, Germany) at 550°C and washed with a 1:1 HCl:H2O ratio. The samples were burned on a hot plate to completely burn the organic matter. They were then placed in a flask overnight at a temperature of 550°C. After this time, they were allowed to cool in a desiccator, and the weights were recorded on an analytical balance. The results were expressed in grams per 100 grams of sample.

3.6. Energy Value or Calories

The caloric value was calculated using the Atwater factors [3], the sum of the energy provided by carbohydrates, proteins, and lipids, in which the contents of each parameter were multiplied by their energy equivalent, expressed in kcal/g. Carbohydrates and proteins were multiplied by 4, while lipids were multiplied by 9. The results were expressed in kcal/100 grams.

**4. Mineral elements**

The mineral composition included sodium, magnesium, calcium, manganese, iron, zinc, and copper. The procedures used were based on official methodologies of the AOAC 968.08 [1]. This methodology is based on atomic absorption spectrometry, using a Shimadzu model AA6300 (Kyoto, Japan) with a flame detector. The quantification of the mineral elements in each food was determined using calibration curves prepared with standardized solutions of 1000 mg/L, considering linearity for each mineral. The wavelength of maximum absorbance depends on each mineral element.

1. **Fatty acids profile**

To obtain the oil from the freeze-dried beverage, 10 grams were shaken with 30 mL of hexane in an Erlenmeyer flask with constant stirring for 2 hours at room temperature. After this time, the sample was filtered through analytical grade sodium sulfate in a flat-bottomed flask, and the hexane was extracted from the oil using a rotary evaporator. The process was performed in duplicate according to AOCS Ce 2-66 methodology [4], where the sample was first dissolved in a water bath with 0.5 M methanolic sodium hydroxide, then BF 3-methanol was added to the hot solution, followed by heptane, and any remaining water that might be in the heptane phase was removed with sodium sulfate. The latter was maintained at -20°C until the day of GC injection. Each extraction was injected in triplicate into a GC-FID gas chromatograph (Model GC-2010 Plus, Shimadzu brand) (Kyoto, Japan), equipped with a 30-meter, 0.32-mm diameter Stabilwax (Crossbond Carbowax polyethylene glycol) column, according to AOCS method Ce d-91(49). The chromatographic conditions were: carrier gas nitrogen and auxiliary gas hydrogen. Injector temperature 240°C, injection mode Split ratio 20:1, 1 µL injection volume, Temperature program: 60°C (hold: 0.5 min), 10°C/min up to 180°C (hold: 5 min), 5°C/min up to 215°C (hold: 0 min), 1°C/min up to 220°C (hold: 0 min), 5°C/min up to 240°C (hold: 16 min). Detector temperature 400°C.

**6. Antioxidant potential**

To determine the antioxidant potential of the samples, the content of Total polyphenols and antioxidant activity through the radical inhibition test ABTS. To make both determinations first an extract was performed. Briefly, a certain amount of each sample was weighed in triplicate. One was performed First extraction with 20ml of methanol: water proportion 60:40, and then with 20ml of Acetone: water proportion 70:30. Both extracts leaked and brought to a volume of 50 ML with water for later determination of total polyphenols and inhibition reaction of the radical ABTS.

6.1. Total Polyphenolic Compounds

Total Polyphenolic Compounds (TPC) were determined by the Folin-Ciocalteu method established by Singleton and Rossi [5] in UV-Visible Spectrophotometer brand Shimadzu Model UV-1800 (Kyoto, Japan). The Folin-Ciocalteau reagents (phosphomolybdate and phosphotungstate acidic solutions) oxidize polyphenolic compounds to phenolates in alkaline medium, forming a molybdenum complex - blue tungsten that presents a maximum of Absorption at 765 nm. To quantify the total polyphenols a curve of Calibration using gallic acid as a pattern. The results were expressed as Milligrams of Galic acid equivalent/100 grams of sample.

6.2. ABTS

According to the methodology described by Re et All [6], for the formation of the radical ABTS combined a 2.45mm potassium persulfate solution and an ABTS 7mm solution, incubated at room temperature and in darkness for at least 20 hours. This solution is Dilute in absolute ethanol to an absorbance of 0.7 ± 0.02 to 730 nm. For the curve of Calibration A synthetic antioxidant stock solution of Trolox reference (acid 6-hydroxy -2,5,7,8- TetramethylCromo-2-97%carboxylic acid). 200 200 was used for reaction Extract microliters and 2.5 ml of the radical ABTS, took a 35 ° C a 3rd bath for 30 for 30 minutes and then the absorbance was read at 730 nm. The results were expressed in activity Antioxidant equivalent to Trolox (TEAC) per 100 grams of sample.

**7. Statistical analysis**

The data was registered in an Excel spreadsheet and then analyzed in the R Studio version 4.4.1 program, where an ANOVA with Tukey *a posteriori* test was done, with a 95% accuracy rate.

**8. Ethical statement**

The sensory analysis, which included the formulation preference panel, was conducted with 30 untrained panelists, in compliance with ethical principles for working with human subjects (Protocol approved by the FCQ-UNA Research Ethics Committee, Code 1082/2023). Prior to the sensory analysis, a microbiological evaluation of the products was performed, and informed consent was obtained from all panelists.

**REFERENCES**

1. Association of Official Analytical Chemists (AOAC) (2000) Official Methods of Analysis of AOAC International, 17th edition. AOAC International, Gaithersburg, MD, USA

2. Dreywood R (1946) Qualitative Test for Carbohydrate Material. Ind Eng Chem Anal Ed 18:499–499. https://doi.org/10.1021/i560156a015

3. Atwater WO, Bryant AP (1900) The availability and fuel values of food materials. Connecticut Agricultural Experiment Station, New Haven, CT

4. American Oil Chemists’ Society (AOCS) (2009) Official Method Ce 2-66: Preparation of Methyl Esters of Fatty Acids. AOCS, Champaign, IL, USA

5. Singleton VL, Rossi JA (1965) Colorimetry of Total Phenolics with Phosphomolybdic-Phosphotungstic Acid Reagents. Am J Enol Vitic 16:144–158. https://doi.org/10.5344/ajev.1965.16.3.144

6. Re R, Pellegrini N, Proteggente A, et al (1999) Antioxidant activity applying an improved ABTS radical cation decolorization assay. Free Radical Biology and Medicine 26:1231–1237. https://doi.org/10.1016/S0891-5849(98)00315-3
